# Supplementary material for: Glutathione Deficiency and Alterations in the Sulfur Amino Acid Homeostasis during Early Postnatal Development as Potential Triggering Factors for Schizophrenia-Like Behavior in Adult Rats
Source: PubMed Central journal article supplement (PMC6930621; doi:10.3390/molecules24234253), 2019-11-22
Supplement: molecules-24-04253-s001.pdf [file molecules-24-04253-s001.pdf]

# Glutathione deficiency and alterations in the sulfur amino acid homeostasis during early postnatal development as potential triggering factors for schizophrenia-like behavior in adult rats

Magdalena Górny<sup>1</sup>, Agnieszka Wnuk<sup>2</sup>, Adrianna Kamińska<sup>3</sup>, Kinga Kamińska<sup>2</sup>, Grażyna Chwatko<sup>3</sup>, Anna Bilska-Wilkosz<sup>1</sup>, Małgorzata Iciek<sup>1</sup>, Małgorzata Kajta<sup>2</sup>, Zofia Rogóż<sup>2</sup>, Elżbieta Lorenc-Koci<sup>2</sup>

<sup>1</sup> The Chair of Medical Biochemistry, Jagiellonian University Medical College, 7 Kopernika Street, 31-034 Kraków, Poland

<sup>2</sup> Maj Institute of Pharmacology, Polish Academy of Sciences, 12 Smętna Street, 31-343 Kraków, Poland;

<sup>3</sup> Department of Environmental Chemistry, University of Łódź, 163 Pomorska Street, 90-236 Łódź, Poland;

\* Correspondence: [lorenc@if-pan.krakow.pl](mailto:lorenc@if-pan.krakow.pl)

Supporting information

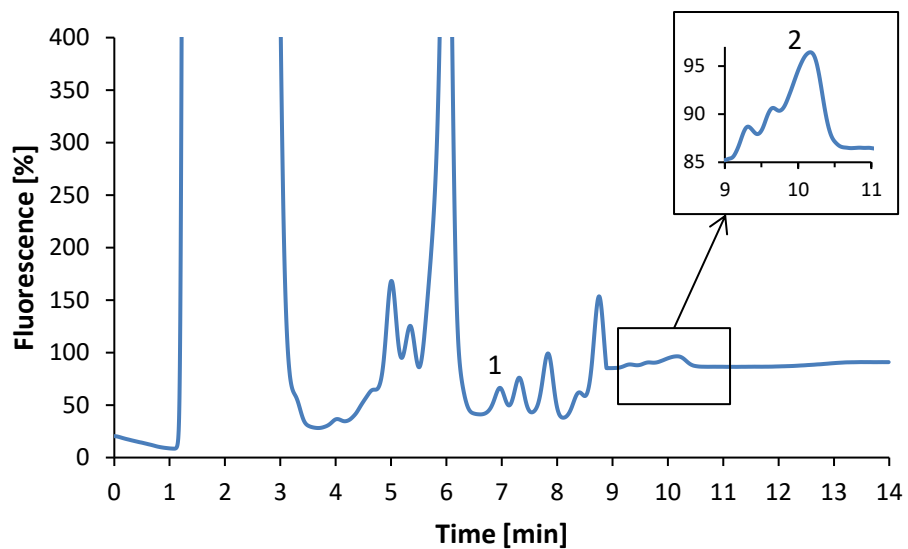

**Figure S1.** Representative chromatogram for methionine and homocysteine assay in the liver homogenate. Peaks: 1 - methionine, 2 - homocysteine.

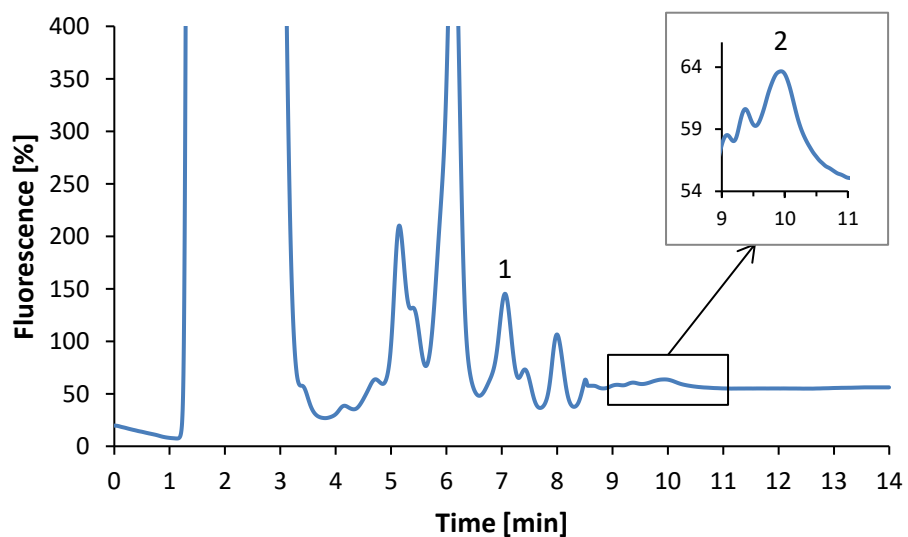

**Figure S2.** Representative chromatogram for methionine and homocysteine assay in the kidney homogenate. Peaks: 1 - methionine, 2 - homocysteine.

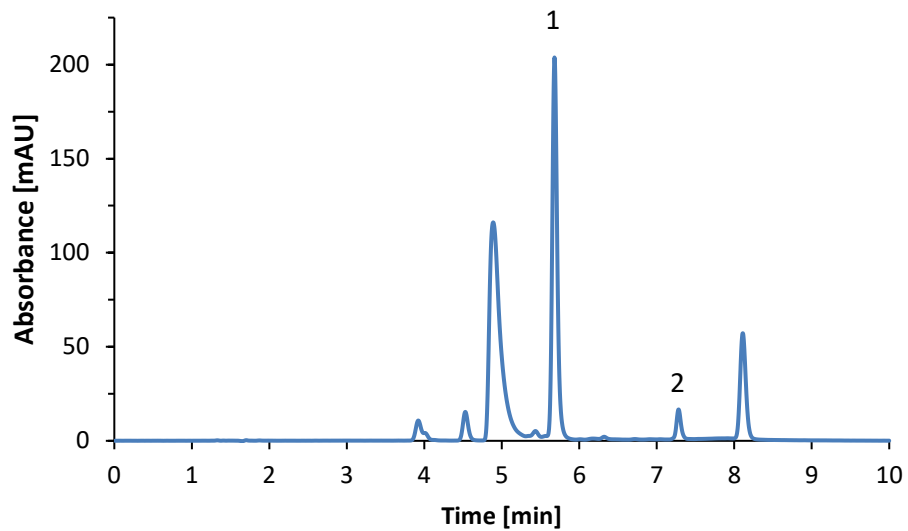

**Figure S3.** Representative chromatogram for glutathione and cysteine assay in the prefrontal cortex (PFC) homogenate. Peaks: 1 - glutathione, 2 - cysteine.

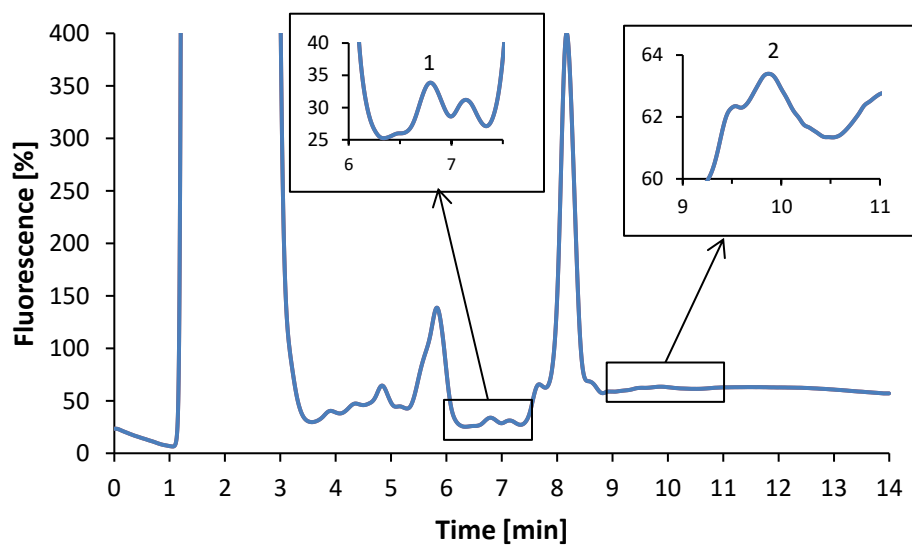

**Figure S4.** Representative chromatogram for methionine and homocysteine assay in the PFC homogenate. Peaks: 1 - methionine, 2 - homocysteine.

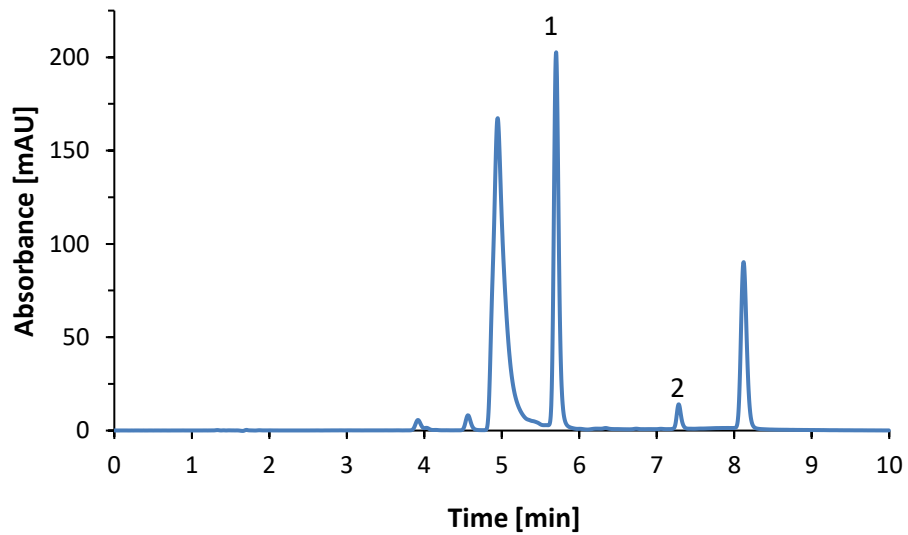

**Figure S5.** Representative chromatogram for glutathione and cysteine assay in the hippocampus (HIP) homogenate. Peaks: 1 - glutathione, 2 - cysteine.

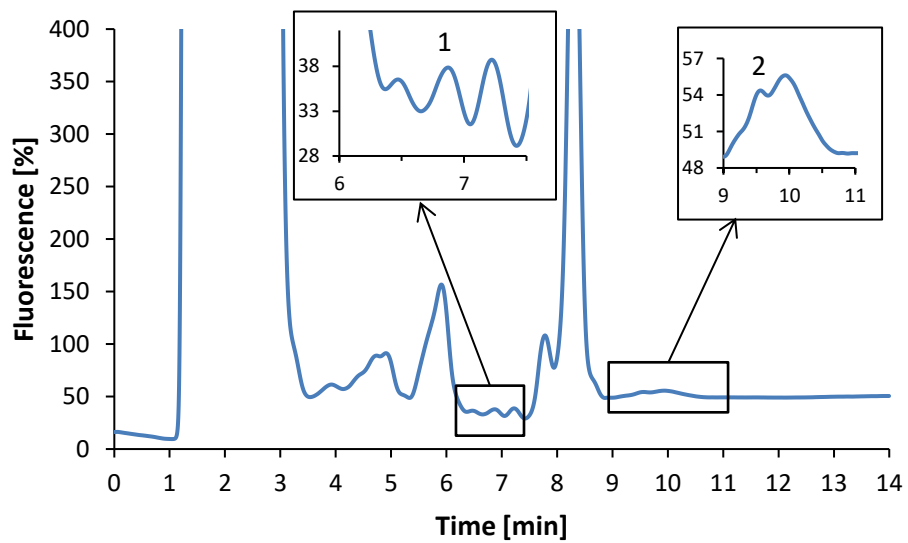

**Figure S6.** Representative chromatogram for methionine and homocysteine assay in the HIP homogenate. Peaks: 1 - methionine, 2 - homocysteine.
